# THE AMERICAN JOURNAL OF PSYCHIATRY

---

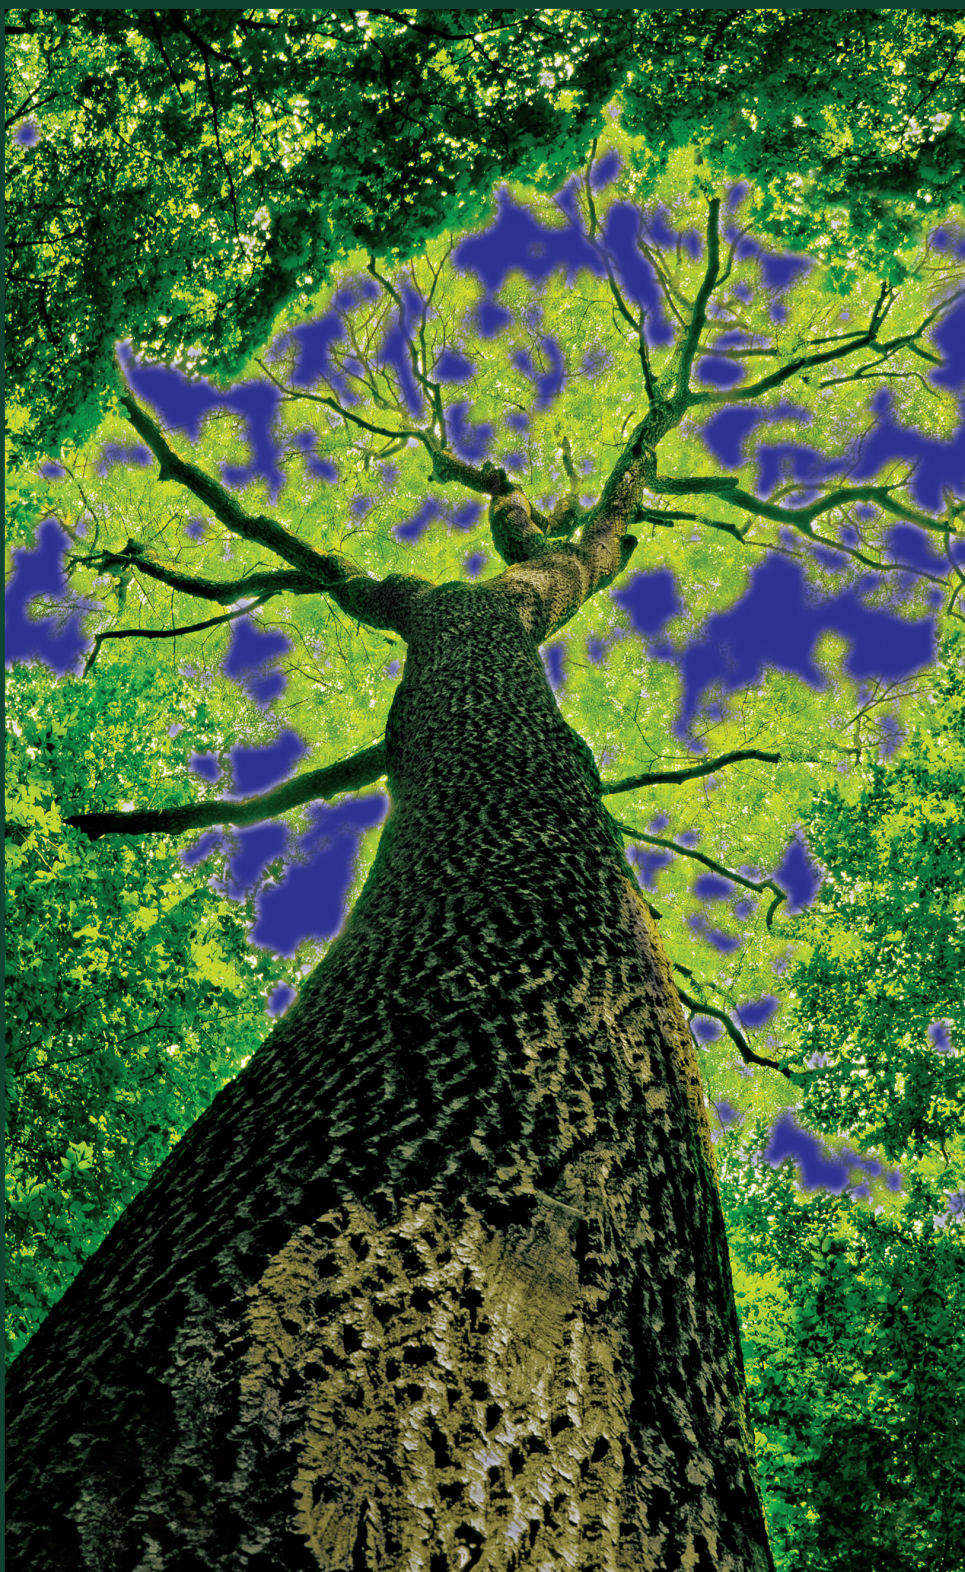

- ◀ **The Suprasensory World of Bipolar II Disorder**  
Gordon Parker 614
- Evaluation of D-Cycloserine or Alprazolam Combined With Virtual Reality Exposure Therapy for Posttraumatic Stress Disorder in Iraq and Afghanistan War Veterans**  
Barbara Olasov Rothbaum, Ph.D., et al. 640
- Early Prevention of Antisocial Personality: Long-Term Follow-Up of Two Randomized Controlled Trials Comparing Indicated and Selective Approaches**  
Stephen Scott, F.R.C.Psych., et al. 649
- Pharmacotherapy and Family-Focused Treatment for Adolescents With Bipolar I and II Disorders**  
David J. Miklowitz, Ph.D., et al. 658

**June 2014**

**Volume 171 • Number 6**

---

Official Journal of the  
AMERICAN PSYCHIATRIC ASSOCIATION

---

[ajp.psychiatryonline.org](http://ajp.psychiatryonline.org)
