# THE AMERICAN PSYCHIATRIC ASSOCIATION

1000 Wilson Blvd., Suite 1825, Arlington, VA 22209-3901  
(888) 357-7924 (toll-free inside the U.S. and Canada) / (703) 907-7300  
web site: [www.psychiatry.org](http://www.psychiatry.org) • e-mail: [apa@psych.org](mailto:apa@psych.org)

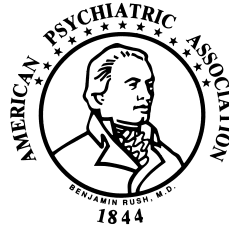

## OFFICERS 2013–2014

|                 |                            |
|-----------------|----------------------------|
| President       | Jeffrey A. Lieberman, M.D. |
| President-Elect | Paul Summergrad, M.D.      |
| Treasurer       | David Fassler, M.D.        |
| Secretary       | Maria A. Oquendo, M.D.     |

## ASSEMBLY

|               |                        |
|---------------|------------------------|
| Speaker       | Melinda L. Young, M.D. |
| Speaker-Elect | Jenny L. Boyer, M.D.   |
| Recorder      | Glenn A. Martin, M.D.  |

## MEDICAL DIRECTOR'S OFFICE

Medical Director and CEO    Saul Levin, M.D., M.P.A.

## BOARD OF TRUSTEES

|                              |                         |                             |
|------------------------------|-------------------------|-----------------------------|
| Jeffrey Akaka, M.D.          | Jeffrey Geller, M.D.    | Phillip M. Murray, M.D.     |
| Christina J. Arredondo, M.D. | Marc David Graff, M.D.  | James E. Ninger, M.D.       |
| Carol A. Bernstein, M.D.     | James A. Greene, M.D.   | John M. Oldham, M.D.        |
| Lara J. Cox, M.D., M.S.      | Dilip V. Jeste, M.D.    | Uyen-Khanh Quang-Dang, M.D. |
| Brian Crowley, M.D.          | Judith F. Kashtan, M.D. | Gail E. Robinson, M.D.      |
| Anita S. Everett, M.D.       | Molly K. McVoy, M.D.    | Erik R. Vanderlip, M.D.     |

## PUBLISHER

Rebecca D. Rinehart

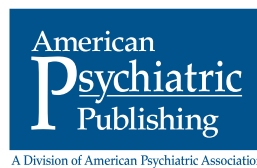

The American Journal of Psychiatry is online at [ajp.psychiatryonline.org](http://ajp.psychiatryonline.org)

APA Officers and Chairpersons for 2014-2015 took office at the conclusion of the APA Annual Meeting, after this issue went to press. The July issue of *The American Journal of Psychiatry* will feature these officeholders.

# THE AMERICAN PSYCHIATRIC ASSOCIATION

## Chairpersons of Councils, Commissions, Committees, and Task Forces

### Standing Committees

---

**Bylaws**

Rebecca W. Brendel, M.D., J.D.

**Elections**

Barry K. Herman, M.D.

**Ethics**

Richard D. Milone, M.D.

**Finance and Budget**

Alan F. Schatzberg, M.D.

**Audit**

David Fassler, M.D.

**Investment Oversight**

Larry R. Faulkner, M.D.

**Joint Reference**

Paul Summergrad, M.D.

**Membership**

Jonathan M. Amiel, M.D.

**Nominating**

Dilip V. Jeste, M.D.

**Tellers**

Hind Benjelloun, M.D.

### Council on Addiction Psychiatry

---

Frances R. Levin, M.D.

### Council on Advocacy and Government Relations

---

Robert Paul Cabaj, M.D.

**Advocacy and Litigation Funding**

Renee L. Binder, M.D.

### Council on Children, Adolescents, and Their Families

---

Louis J. Kraus, M.D.

**Agnes Purcell McGavin Award**

Christopher J. McDougle, M.D.

**Blanche F. Ittleson Research Award**

Matthew W. State, M.D.

### Council on Communications

---

Jeffrey A. Borenstein, M.D.

### Council on Geriatric Psychiatry

---

Robert P. Roca, M.D.

### Council on Healthcare Systems and Financing

---

Harsh K. Trivedi, M.D.

**Reimbursement for Psychiatric Care**

Bruce J. Schwartz, M.D.

**RBRVS, Codes and Reimbursement**

Ronald M. Burd, M.D.

### Council on Medical Education and Lifelong Learning

---

Richard F. Summers, M.D.

**APA Public Psychiatry Fellowship Selection Committee**

Christina V. Mangurian, M.D.

**APA/SAMHSA Minority Fellowship Selection and Advisory**

Altha J. Stewart, M.D.

**Scientific Program**

Philip R. Muskin, M.D.

**Scientific Program Committee of the Institute on Psychiatric Services**

Hunter L. McQuiston, M.D.

**Task Force to Update the Ethics Annotations**

Laura W. Roberts, M.D.

**Vestermark Award Committee**

Joel Yager, M.D.

### Council on Minority Health and Health Disparities

---

Sandra C. Walker, M.D.

### Council on Psychiatry And Law

---

Steven K. Hoge, M.D.

**Isaac Ray/Human Rights Award**

Steven K. Hoge, M.D.

**Judicial Action**

Paul S. Appelbaum, M.D.

**Manfred S. Guttmacher Award**

David A. Lowenthal, M.D.

### Council on Psychosomatic Medicine (Consultation Liaison Psychiatry)

---

Joel E. Dimsdale, M.D.

### Council on Quality Care

---

Joel Yager, M.D.

**Mental Health Information Technology**

Steven Roy Daviss, M.D.

**Steering Committee on Practice Guidelines**

Michael J. Vergare, M.D.

### Council on Research

---

Dwight L. Evans, M.D.

**Psychiatric Dimensions of Disasters**

Charles R. Marmar, M.D.

**Research Awards**

Timothy B. Walsh, M.D.

**Task Force to Revise the Practice of Electroconvulsive Therapy**

Sarah H. Lisanby, M.D.

APA Officers and Chairpersons for 2014–2015 took office at the conclusion of the APA Annual Meeting, after this issue went to press. The July issue of *The American Journal of Psychiatry* will feature these officeholders.

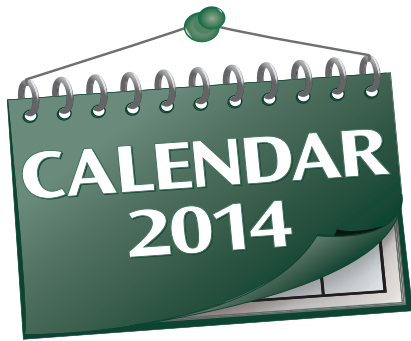

For free listing of your organization's official annual or regional meeting, please send us the following information: sponsor, location, inclusive dates, type and number of continuing education credits (if available), and the name, address, and telephone number of the person or group to contact for more information. In order for an event to appear in our listing, all notices and changes must be received at least 6 months in advance of the meeting and should be addressed to:

**Calendar, American Journal of Psychiatry, 1000 Wilson Boulevard, Suite 1825, Arlington, VA 22209-3901, [swestate@psych.org](mailto:swestate@psych.org) (e-mail).**

Because of space limitations, only listings of meetings of the greatest interest to Journal readers may be included.

## JULY

**July 8–13**, 28th International Congress of Applied Psychology, Palais de Congrès de Paris, France. Contact [exh@icap2014.com](mailto:exh@icap2014.com) (e-mail), [www.icap2014.com](http://www.icap2014.com) (web site).

**July 30–August 1**, 39th Annual University of Colorado Psychiatry Conference, The Gant, Aspen, featuring Glenn Gabbard, M.D., and John Gunderson, M.D., *Good Psychiatric Management*. Contact: Joelynn Jewell, [Joelynn.Jewell@ucdenver.edu](mailto:Joelynn.Jewell@ucdenver.edu) (e-mail), (303) 724 7401 (tel) for information and brochure.

## AUGUST

**August 21–23**, 6th International Conference on Schizophrenia VI (IconS VI), Chennai, India. Organized by Schizophrenia Research Foundation (SCARF) and co-sponsored by WPA, WASP, and IPS. Contact [www.iconsoscarf.org](http://www.iconsoscarf.org) (web site).

## SEPTEMBER

**September 10–12**, The International Marcé Society for Perinatal Mental Health Conference, Swansea, Wales. [www.swansea.ac.uk/marce/](http://www.swansea.ac.uk/marce/) (web site).

## OCTOBER

**October 11–12**, 15th Joint Meeting, American Academy of Psychoanalysis and Dynamic Psychiatry (AAPDP) with Organizzazione di Psicoanalisti Italiani Federazione e Registro (OPIFER), Pisa, Italy. Contact: [info@AAPDP.org](mailto:info@AAPDP.org) (e-mail), [www.AAPDP.org](http://www.AAPDP.org) (web site).

**October 30–November 2**, 66th Institute on Psychiatric Services, San Francisco, CA. [www.psychiatry.org/ips](http://www.psychiatry.org/ips) (web site).

## An essential digital companion to the DSM-5®

*NEW! – Now Spanish language supported!*

### DSM-5® Diagnostic Criteria Mobile App

American Psychiatric Association

The **DSM-5® Diagnostic Criteria Mobile App** is designed to help mental health practitioners, researchers and students fully integrate the new DSM criteria and codes into their practice and study. Users have full offline access to all of the criteria sets as well as online access to supporting videos, commentary and resources. Powerful search and customization tools aid and enhance assessment of symptom presentations in a variety of clinical and administrative settings. It features:

- Access to the complete DSM-5® diagnostic criteria sets on your phone and tablet
- Up to date access to ICD-9-CM and ICD-10-CM codes for clinical and administrative use
- Video commentary from the DSM-5 task force members highlighting changes from DSM-IV to DSM-5
- Robust disorder, acronym, code and symptom search functionality
- Bookmarking allows customization of the criteria sets most commonly referenced

Available for both iOS and Android compatible devices through the iTunes store and Google Play.

As the DSM-5® Diagnostic Criteria Mobile App is only available for sale through the iTunes and Android stores, it is not possible for us to extend our traditional APA Member or APA Resident-Fellow Member discounts on the purchase of this product.

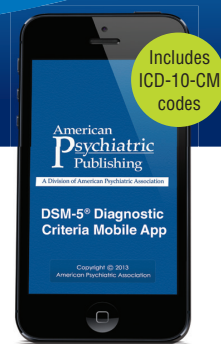

# The Residents' JOURNAL

The Residents' JOURNAL

a publication of  
The American Journal of Psychiatry

---

April 2014
Volume 9
Issue 4

Inside

- 2 **Racial and Ethnic Disparities in Suicide Rates Among American Indian/Alaskan Native Youths**  
Juliet Muzere, D.O.
- 5 **Synthetic Cannabinoids**  
Jason Beaman, D.O.  
Scott McIntosh, M.D.
- 7 **Grief and Hallucination in Sir John Everett Millais' *Speak! Speak!***  
Eveleigh Wagner, B.A.
- 8 **Working With Medical Students in Emergency Psychiatry**  
David Marcovitz, M.D.
- 9 **Outcomes and Alliances: The Case for a New Vocabulary in Psychiatry**  
Whitney E. Black, M.D.
- 12 **Test Your Knowledge**
- 13 **Author Information for *The Residents' Journal* Submissions**
- 13 **Upcoming Themes**

*In This Issue*

This issue of the *Residents' Journal* begins with an article by Juliet Muzere, D.O., on racial and ethnic disparities in suicide rates among American Indian/Alaskan Native youths. Jason Beaman, D.O., and Scott McIntosh, M.D., provide important data on the use of synthetic cannabinoids. Eveleigh Wagner, B.A., presents an enlightening and artistic critique of Sir John Everett Millais' *Speak, Speak!*. David Marcovitz, M.D., offers his commentary on working with medical students in emergency psychiatry. Last, Whitney E. Black, M.D., comments on how therapeutic outcomes are affected by the vocabulary that is used to communicate with patients.

|                                                                                                                                                                                                                                                                                                                                                                                                                                                             |                                                                                                                                                                                                                                                                                                                                                                                                   |
|-------------------------------------------------------------------------------------------------------------------------------------------------------------------------------------------------------------------------------------------------------------------------------------------------------------------------------------------------------------------------------------------------------------------------------------------------------------|---------------------------------------------------------------------------------------------------------------------------------------------------------------------------------------------------------------------------------------------------------------------------------------------------------------------------------------------------------------------------------------------------|
| <p style="text-align: center; font-weight: bold; font-size: xx-small;">Editor-in-Chief</p> <p style="text-align: center;">Arshya Vahabzadeh, M.D.</p> <p style="text-align: center; font-weight: bold; font-size: xx-small;">Deputy Editor</p> <p style="text-align: center;">Misty Richards, M.D., M.S.</p> <p style="text-align: center; font-weight: bold; font-size: xx-small;">Associate Editor</p> <p style="text-align: center;">David Hsu, M.D.</p> | <p style="text-align: center; font-weight: bold; font-size: xx-small;">Editors Emeriti</p> <p style="text-align: center;">Sarah B. Johnson, M.D.<br/>Molly McVoy, M.D.<br/>Joseph M. Cerimele, M.D.<br/>Sarah M. Fayad, M.D.<br/>Monifa Seawell, M.D.</p> <p style="text-align: center; font-weight: bold; font-size: xx-small;">Staff Editor</p> <p style="text-align: center;">Angela Moore</p> |
|-------------------------------------------------------------------------------------------------------------------------------------------------------------------------------------------------------------------------------------------------------------------------------------------------------------------------------------------------------------------------------------------------------------------------------------------------------------|---------------------------------------------------------------------------------------------------------------------------------------------------------------------------------------------------------------------------------------------------------------------------------------------------------------------------------------------------------------------------------------------------|

**Editor-in-Chief**  
Arshya Vahabzadeh, M.D.  
(MGH/Harvard)

**Deputy Editor**  
Misty Richards, M.D., M.S.  
(UCLA)

**Associate Editor**  
David Hsu, M.D.  
(McLean/Harvard)

*The Residents' Journal* accepts manuscripts authored by medical students, resident physicians, and fellows. To submit your paper, please visit the manuscript submission site at [mc.manuscriptcentral.com/appi-ajp](http://mc.manuscriptcentral.com/appi-ajp) and either create an account or use your existing account. For manuscript type, select "Residents." Then follow the instructions to upload your manuscript. Residents who are interested in participating as Guest Section Editors should e-mail *The Residents' Journal* Editor-in-Chief Arshya Vahabzadeh at [vahab1789@gmail.com](mailto:vahab1789@gmail.com).

*The Residents' Journal* is sent free-of-charge to all psychiatry residents. Anyone interested in being included on the distribution list should contact Angela Moore, *The Residents' Journal* staff editor at [ajp@psych.org](mailto:ajp@psych.org) with "Subscribe to Residents' Journal" in the subject line.

# Contents

- A17 Editorial Board  
A19 Highlights of this issue

## Editorials

- 329 **Early responding to traumatic events**  
J. I. Bisson
- 331 **The 25th anniversary of the launch of Prozac gives pause for thought: where did we go wrong?**  
E. Shorter
- 333 **Mindfulness for psychosis**  
P. Chadwick

## Review article

- 335 **Rates of post-traumatic stress disorder in trauma-exposed children and adolescents: meta-analysis**  
E. Alisic, A. K. Zalta, F. van Wesel, S. E. Larsen, G. S. Hafstad, K. Hassanpour and G. E. Smid

## Papers

- 341 **Psychotic traits in comedians**  
V. Ando, G. Claridge and K. Clark

- 345 ***Social Origins of Depression*, by George W. Brown & Tirril Harris – reflection**  
Julian Leff

- 346 **Adversity, cannabis use and psychotic experiences: evidence of cumulative and synergistic effects**  
C. Morgan, U. Reininghaus, A. Reichenberg, S. Frissa, SELCoH study team, M. Hotopf and S. L. Hatch

- 354 **Daily stressors and negative life events in children at elevated risk of developing schizophrenia**  
A. E. Cullen, H. L. Fisher, R. E. Roberts, C. M. Pariante and K. R. Laurens

- 361 **Post-traumatic stress reactions in survivors of the 2011 massacre on Utøya Island, Norway**  
G. Dyb, T. K. Jensen, E. Nygaard, Ø. Ekeberg, T. H. Diseth, T. Wentzel-Larsen and S. Thoresen

- 367 **Not Transference – poems by doctors**  
Jacob Freedman

- 368 **Violent behaviour and post-traumatic stress disorder in US Iraq and Afghanistan veterans**  
E. B. Elbogen, S. C. Johnson, H. R. Wagner, C. Sullivan, C. T. Taft and J. C. Beckham

- 375 ***Macbeth*, by William Shakespeare – in 100 words**  
Trevor Turner

- 376 **Non-fatal repetition of self-harm in Taipei City, Taiwan: cohort study**  
C.-L. Kwok, P. S. F. Yip, D. Gunnell, C.-J. Kuo and Y.-Y. Chen

- 383 **Group problem-solving skills training for self-harm: randomised controlled trial**  
C. McAuliffe, B. C. McLeavey, T. Fitzgerald, P. Corcoran, B. Carroll, L. Ryan, B. O’Keeffe, E. Fitzgerald, P. Hickey, M. O’Regan, J. Mulqueen and E. Arensman

- 390 **When a psychiatrist is a patient – extra**  
Aashish Tagore

- 391 **Efficacy of Coming Out Proud to reduce stigma’s impact among people with mental illness: pilot randomised controlled trial**  
N. Rüsch, E. Abbruzzese, E. Hagedorn, D. Hartenhauer, I. Kaufmann, J. Curschellas, S. Ventling, G. Zuaboni, R. Bridler, M. Olschewski, W. Kawohl, W. Rössler, B. Kleim and P. W. Corrigan

## Short reports

- 398 **22q11.2 deletion carriers and schizophrenia-associated novel variants**  
S. Balan, Y. Iwayama, T. Toyota, M. Toyoshima, M. Maekawa and T. Yoshikawa
- 400 **Anxiety symptoms, cerebral amyloid burden and memory decline in healthy older adults without dementia: 3-year prospective cohort study**  
R. H. Pietrzak, J. C. Scott, A. Neumeister, Y. Y. Lim, D. Ames, K. A. Ellis, K. Harrington, N. T. Lautenschlager, C. Szoeki, R. N. Martins, C. L. Masters, V. L. Villemagne, C. C. Rowe and P. Maruff for the Australian Imaging, Biomarkers and Lifestyle (AIBL) Research Group

## Columns

- 402 **Correspondence**  
406 **Ten books . . . chosen by Elaine Murphy**  
409 **Book reviews**  
412 **Contents of the *American Journal of Psychiatry***  
413 **From the Editor’s desk**  
414 **Contents of *Advances in Psychiatric Treatment***

## Cover picture

*Illness* (2013). Edward Mellor (b. 1995).

Ed Mellor is a Year 13 student at Biddulph High School, undertaking Photography, History and English Literature A-Levels. This photograph came from a project based around mental illness and represents an individual trying to make sense of what is real and what is not. Ed wishes to study BA(Hons) Makeup for Media and Performance at the London College of Fashion.

We are always looking for interesting and visually appealing images for the cover of the *Journal* and would welcome suggestions or pictures, which should be sent to Dr Allan Beveridge, British Journal of Psychiatry, 21 Prescot Street, London E1 8BB, UK or [bjp@rcpsych.ac.uk](mailto:bjp@rcpsych.ac.uk).

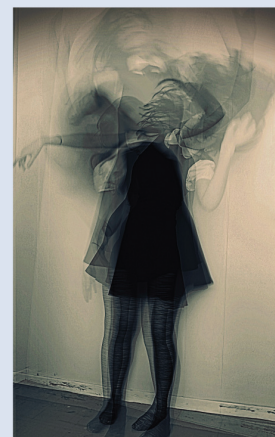

Source: http://ajp.psychiatryonline.org/doi/suppl/10.1176/ajp.2014.171.issue-6/suppl_file/front.pdf
